# Supplementary material for: Completeness of Social and Behavioral Determinants of Health in Electronic Health Records: A case study on the Patient-Provided Information from a minority cohort with sexually transmitted diseases
Source: Research Square preprint supplement (doi:10.21203/rs.3.rs-123744/v1), 2020-12-10
Supplement: Supplementary file 1 [file 80963a6cf9986032995abd94.docx]

Table S1: Documentation completeness analysis: Number of patients with SDOH records

| **Range of questions** | **Number of patients with SDOH records in the given range** | | | | | | |
| --- | --- | --- | --- | --- | --- | --- | --- |
| **All concepts** | **Alcohol use** | **Substance use** | **Sexual**  **activity** | **Sexual orientation** | **Housing status** | **Employment**  **status** |
| 0 | 0 | 0 | 1 | 14 | 1419 | 54 | 93 |
| 1-49 | 835 | 1406 | 1231 | 1466 | 85 | 1450 | 1411 |
| 50 - 99 | 326 | 96 | 236 | 24 | 0 | 0 | 0 |
| 100-149 | 165 | 2 | 35 | 0 | 0 | 0 | 0 |
| 150-199 | 99 | 0 | 1 | 0 | 0 | 0 | 0 |
| 200-249 | 51 | 0 | 0 | 0 | 0 | 0 | 0 |
| 250-299 | 22 | 0 | 0 | 0 | 0 | 0 | 0 |
| 300-349 | 4 | 0 | 0 | 0 | 0 | 0 | 0 |
| 350-399 | 1 | 0 | 0 | 0 | 0 | 0 | 0 |
| 400-449 | 1 | 0 | 0 | 0 | 0 | 0 | 0 |
| 450-500 | 0 | 0 | 0 | 0 | 0 | 0 | 0 |

Table S2: Documentation completeness analysis: Number of patients with valid SDOH records

| **Range of questions** | **Number of patients with valid SDOH records in the given range** | | | | | | |
| --- | --- | --- | --- | --- | --- | --- | --- |
| **All concepts** | **Alcohol use** | **Substance use** | **Sexual**  **activity** | **Sexual orientation** | **Housing status** | **Employment**  **status** |
| 0 | 0 | 14 | 2 | 20 | 1439 | 103 | 116 |
| 1-49 | 986 | 1425 | 1394 | 1477 | 65 | 1401 | 1388 |
| 50-99 | 302 | 63 | 106 | 7 | 0 | 0 | 0 |
| 100-149 | 129 | 2 | 2 | 0 | 0 | 0 | 0 |
| 150-199 | 60 | 0 | 0 | 0 | 0 | 0 | 0 |
| 200-249 | 22 | 0 | 0 | 0 | 0 | 0 | 0 |
| 250-299 | 3 | 0 | 0 | 0 | 0 | 0 | 0 |
| 300-349 | 2 | 0 | 0 | 0 | 0 | 0 | 0 |
| 350-399 | 0 | 0 | 0 | 0 | 0 | 0 | 0 |
| 400-449 | 0 | 0 | 0 | 0 | 0 | 0 | 0 |
| 450-500 | 0 | 0 | 0 | 0 | 0 | 0 | 0 |

Table S3: Density completeness analysis: number of patients with SDOH records in the given time span

| **Time Span (Years)** | **Alcohol use** | **Substance use** | **Sexual activity** | **Sexual orientation** | **Housing status** | **Employment status** |
| --- | --- | --- | --- | --- | --- | --- |
| 0 | 480 | 485 | 513 | 1466 | 548 | 598 |
| 0.1-0.99 | 66 | 60 | 49 | 4 | 46 | 42 |
| 1-1.99 | 119 | 117 | 112 | 17 | 115 | 113 |
| 2-2.99 | 86 | 85 | 88 | 7 | 86 | 83 |
| 3-3.99 | 81 | 83 | 82 | 5 | 78 | 84 |
| 4-4.99 | 55 | 54 | 56 | 4 | 48 | 44 |
| 5-5.99 | 62 | 64 | 64 | 1 | 62 | 63 |
| 6-6.99 | 69 | 70 | 70 | 0 | 67 | 65 |
| 7-7.99 | 47 | 48 | 45 | 0 | 43 | 43 |
| 8-8.99 | 64 | 61 | 64 | 0 | 61 | 55 |
| 9-9.99 | 54 | 56 | 52 | 0 | 50 | 53 |
| 10-10.99 | 57 | 57 | 59 | 0 | 56 | 47 |
| 11-11.99 | 53 | 51 | 50 | 0 | 47 | 40 |
| 12-12.99 | 62 | 60 | 60 | 0 | 60 | 45 |
| 13-13.99 | 64 | 64 | 63 | 0 | 60 | 52 |
| 14-14.99 | 49 | 52 | 50 | 0 | 50 | 41 |
| 15-15.99 | 23 | 25 | 15 | 0 | 15 | 25 |
| 16-16.99 | 10 | 9 | 11 | 0 | 11 | 8 |
| 17-17.99 | 3 | 3 | 1 | 0 | 1 | 3 |

Table S4: Density completeness analysis: number of patients with valid SDOH records in the given time span

| **Time_span (Years)** | **alcohol_use** | **substance_use** | **sexual_activity** | **sexual_orientation** | **housing_status** | **employment_status** |
| --- | --- | --- | --- | --- | --- | --- |
| 0 | 513 | 494 | 524 | 1477 | 605 | 626 |
| 0.1-0.99 | 64 | 59 | 47 | 4 | 37 | 42 |
| 1-1.99 | 116 | 116 | 114 | 14 | 114 | 112 |
| 2-2.99 | 84 | 86 | 88 | 4 | 79 | 77 |
| 3-3.99 | 78 | 78 | 78 | 5 | 80 | 83 |
| 4-4.99 | 55 | 55 | 57 | 0 | 49 | 44 |
| 5-5.99 | 59 | 62 | 65 | 0 | 57 | 61 |
| 6-6.99 | 63 | 71 | 69 | 0 | 60 | 61 |
| 7-7.99 | 48 | 49 | 48 | 0 | 44 | 43 |
| 8-8.99 | 61 | 60 | 58 | 0 | 52 | 55 |
| 9-9.99 | 50 | 55 | 52 | 0 | 48 | 49 |
| 10-10.99 | 56 | 56 | 59 | 0 | 53 | 46 |
| 11-11.99 | 55 | 52 | 49 | 0 | 43 | 38 |
| 12-12.99 | 61 | 62 | 59 | 0 | 59 | 44 |
| 13-13.99 | 62 | 62 | 62 | 0 | 57 | 50 |
| 14-14.99 | 45 | 50 | 50 | 0 | 46 | 38 |
| 15-15.99 | 21 | 26 | 14 | 0 | 12 | 24 |
| 16-16.99 | 10 | 8 | 10 | 0 | 8 | 8 |
| 17-17.99 | 3 | 3 | 1 | 0 | 1 | 3 |

Table S5. Number of patients for each SDOH domain in terms of gender

|  | Male (Total #=713/713, 23.82%) | Female (Total #=791/791, 26.42%) |
| --- | --- | --- |
| Alcohol use | 708, 99.29% | 782, 98.86% |
| Substance use | 712, 99.85% | 790, 99.87% |
| Sexual orientation | 0, 0% | 65, 8.21% |
| Sexual activity | 699, 98.03% | 785, 99.24% |
| Housing status | 657, 92.14% | 744, 94.05% |
| Employment status | 656, 92% | 732, 92.54% |

Table S6: Number of patients for each SDOH domain in terms of age

|  | 18-34(#385, 12.96%) | 35-44(#377,12.4% ) | 45-54(#276, 9.2%) | 55-64(#193, 6.38%) | 65-74 (#157, 5.3%) | 75-84(#77, 2.5 %) | >85 (#36, 1.2%) |
| --- | --- | --- | --- | --- | --- | --- | --- |
| Alcohol use | 381, 99.21% | 374, 99.2% | 274, 99.27% | 192, 6.34% | 153, 97.45% | 77, 100% | 36, 100% |
| Substance use | 384, 99.74% | 377, 100% | 276, 100% | 192, 6.34% | 157, 100% | 77, 100% | 36, 100% |
| Sexual orientation | 6, 1.55% | 29, 7.69% | 16, 5.79% | 7, 0.2%% | 5, 3.18% | 1, 1.29% | 1,2.7% |
| Sexual activity | 375, 97.4% | 373, 98.93% | 273, 98.91% | 192, 6.34% | 156, 99.36% | 76, 98.7% | 36, 100% |
| Housing status | 321, 83.37% | 364,96.55% | 263, 95.28% | 187, 6.18% | 153, 97.45% | 76, 98.7% | 35, 97.22% |
| Employment status | 289, 75.06% | 372, 98.67% | 269, 9.02% | 192, 97.46% | 156, 99.36% | 75, 97.4% | 35, 97.22% |

Table S7. Number of patients for each SDOH domain in terms of education level

|  | 4-year college graduate (#242, 8.08% ) | Some College or 2 year degree (#464, 15.5%) | Post graduate studies (#245, 8.18% ) | Some high school, but did not graduate (#222, 7.41%) | 8th grade or less (#120, 4%) | High School graduate or GED (#435, 14.53%) |
| --- | --- | --- | --- | --- | --- | --- |
| Alcohol use | 242, 100% | 460, 15.3 % | 243, 99.18% | 222, 100% | 118, 98.33% | 434, 99.77% |
| Substance use | 242, 100% | 464, 100% | 245, 100% | 222, 100% | 120, 100% | 435, 100% |
| Sexual orientation | 21, 8.67% | 28, 6.03% | 11, 4.48% | 7, 3.15% | 2, 1.66% | 14, 3.21% |
| Sexual activity | 242, 100% | 463, 99.78% | 244, 99.59% | 221, 99.54% | 119, 99.16% | 431, 99.08% |
| Housing status | 240, 99.17% | 452, 97.41% | 240, 97.95% | 212, 95.49% | 116, 96.66% | 417, 95.86% |
| Employment status | 241, 99.58% | 456, 98.27% | 242, 98.77% | 216, 97.29% | 120, 100% | 424, 97.47% |

Table S8. Number of patients for each SDOH domain in terms of living area

|  | Urban (#283, 9.45%) | Sub-urban (#1100, 36.75%) | Rural (#11, 0.36%) |
| --- | --- | --- | --- |
| Alcohol use | 280, 98.93% | 1090, 99.09% | 11, 100% |
| Substance use | 283, 100% | 1098, 99.81% | 11, 100% |
| Sexual orientation | 6, 2.12% | 56, 5.09% | 0, 0% |
| Sexual activity | 277, 97.87% | 1090, 99.09% | 11, 100% |
| Housing status | 248, 87.63% | 1041,94.63% | 9, 81.81% |
| Employment status | 244,86.21% | 1028,93.45% | 10, 90.9% |
